# Supplementary material for: Synthesis, crystal structure, molecular docking studies and bio-evaluation of some N 4 -benzyl-substituted isatin- 3-thiosemicarbazones as urease and glycation inhibitors
Source: publisher site journal article supplement (doi:10.1515/hc-2017-0148), 2018-01-10

**Supporting Information**

**Synthesis, crystal structure, molecular docking studies and bio-evaluation of some N4-benzyl substituted isatin-3-thiosemicarbazones as antiurease and antiglycating agents**

Humayun Pervez,*,a Nazia Khan,a Jamshed Iqbal,b Sumera Zaib,b,c Muhammad Yaqub,a Muhammad Nawaz Tahir,d Muhammad Moazzam Naseer*, e

*aInstitute of Chemical Sciences, Organic Chemistry Division, Bahauddin Zakariya University, Multan 60800, Pakistan*

*bCentre for Advanced Drug Research, COMSATS Institute of Information Technology, Abbottabad 22060, Pakistan*

*cDepartment of Bioinformatics & Biotechnology, International Islamic University, Islamabad 44000, Pakistan*

*dDepartment of Physics, University of Sargodha, Sargodha 45320, Pakistan*

*eDepartment of Chemistry, Quaid-i-Azam University, Islamabad 45320, Pakistan*

**Correspondence:** [pdhpervez@hotmail.com](mailto:pdhpervez@hotmail.com) (H. Pervez); [moazzam@qau.edu.pk](mailto:moazzam@qau.edu.pk) (M.M. Naseer)

**Table of Contents:**

1. **Figure S1.**The proposed fragmentation pattern of compound **5i**.
2. **Table S1.**Crystallographic data of **5h**
3. **Table S2.**Growth inhibition of *Lemna aequinocitalis* by compounds **5a-o**at different concentrations
4. **Table S3.**Brine shrimp (*Artemia salina*) lethality bioassay for compounds **5a-o**
5. **Table S4.**Free binding energy and ADME profile of compounds **5a-o**
6. Copies of representative 1H, 13C NMR & Mass Spectra.

**Figure S1.**The proposed fragmentation pattern of compound **5i**.

**Table S1.**Crystallographic data of **5h**

| Crystal data | **5h** |
| --- | --- |
| CCDC | 1005938 |
| Chemical formula | C16H13FN4OS |
| *M*r | 328.36 |
| Crystal system, space group | Monoclinic, *P*21/*c* |
| Temperature (K) | 296 |
| *a*, *b*, *c* (Å) | 13.9633 (14), 13.7855 (14), 8.2234 (8) |
|  (°) | 91.048 (7) |
| *V* (Å3) | 1582.7 (3) |
| *Z* | 4 |
| Radiation type | Mo *K* |
|  (mm-1) | 0.22 |
| Crystal size (mm) | 0.32 × 0.28 × 0.25 |
| **Data collection** | |
| Diffractometer | Bruker Kappa APEXII CCD |
| Absorption correction | Multi-scan  (*SADABS*; Bruker, 2005) |
| *T*min, *T*max | 0.934, 0.944 |
| No. of measured, independent and  observed [*I*> 2(*I*)] reflections | 13380, 3757, 2343 |
| *R*int | 0.053 |
| (sin /)max (Å-1) | 0.659 |
| **Refinement** | |
| *R*[*F*2> 2(*F*2)], *wR*(*F*2), *S* | 0.055, 0.134, 1.02 |
| No. of reflections | 3757 |
| No. of parameters | 208 |
| H-atom treatment | H-atom parameters constrained |
| max, min (e Å-3) | 0.29, -0.23 |

**Table S2.**Growth inhibition of *Lemna aequinocitalis* by compounds **5a-o**a at different concentrations

#

| Compound | R | 1000  µg/mL  (% G.I) | 100  µg/mL  (% G.I) | 10  µg/mL  (% G.I) | 500  µg/mL  (% G.I) | 50  µg/mL  (% G.I) | 5  µg/mL  (% G.I) |
| --- | --- | --- | --- | --- | --- | --- | --- |
| **5a** | C6H5 | − | − | − | 10 | 00 | 00 |
| **5b** | 2-CH3C6H4 | 100 | 75 | 00 | − | − | − |
| **5c** | 3-CH3C6H4 | 10 | 00 | 00 | − | − | − |
| **5d** | 4-CH3C6H4 | 15 | 05 | 00 | − | − | − |
| **5e** | 2-CH3OC6H4 | 00 | 00 | 00 | − | − | − |
| **5f** | 3-CH3OC6H4 | − | − | − | 00 | 00 | 00 |
| **5g** | 4-CH3OC6H4 | 10 | 05 | 00 | − | − | − |
| **5h** | 2-FC6H4 | − | − | − | 10 | 00 | 00 |
| **5i** | 3-FC6H4 | 00 | 00 | 00 | − | − | − |
| **5j** | 4-FC6H4 | 10 | 00 | 00 | − | − | − |
| **5k** | 2-ClC6H4 | 05 | 00 | 00 | − | − | − |
| **5l** | 3-ClC6H4 | 15 | 00 | 00 | − | − | − |  | − |
| **5m** | 4-ClC6H4 | − | − | − | 00 | 00 | 00 |
| **5n** | 2,4-(Cl)2C6H3 | 10 | 05 | 00 | − | − | − |
| **5o** | 3,4-(Cl)2C6H3 | 10 | 05 | 00 | − | − | − |

a The standard drug, paraquat, shows 100% growth inhibition at a concentration of 0.015 µg/mL. G.I: Growth inhibition.

**Table S3.**Brine shrimp (*Artemia salina*) lethality bioassay for compounds **5a-o** a

| Compound | R | LD50 (M) |
| --- | --- | --- |
| **5a** | C6H5 | >3.22 x 10-4 |
| **5b** | 2-CH3C6H4 | 3.63 x 10-5 |
| **5c** | 3-CH3C6H4 | >3.08 x 10-4 |
| **5d** | 4-CH3C6H4 | >3.08 x 10-4 |
| **5e** | 2-CH3OC6H4 | >2.94 x 10-4 |
| **5f** | 3-CH3OC6H4 | >2.94 x 10-4 |
| **5g** | 4-CH3OC6H4 | >2.94 x 10-4 |
| **5h** | 2-FC6H4 | >3.04 x 10-4 |
| **5i** | 3-FC6H4 | >3.04 x 10-4 |
| **5j** | 4-FC6H4 | 2.90 x 10-5 |
| **5k** | 2-ClC6H4 | >2.90 x 10-4 |
| **5l** | 3-ClC6H4 | >2.90 x 10-4 |
| **5m** | 4-ClC6H4 | >2.90 x 10-4 |
| **5n** | 2,4-(Cl)2C6H3 | >2.64 x 10-4 |
| **5o** | 3,4-(Cl)2C6H3 | 2.31 x 10-4 |
| **Etoposide** b |  | 1.27 x 10-5 |

a Tested at 100, 10, 1 µg/mL; b The reference anticancer drug.

**Table S4.**Free binding energy and ADME profile of compounds **5a-o**

| Compound | Free binding energy | Milog*P* | TSPA | MW | *n*ON | *n*OHNH |
| --- | --- | --- | --- | --- | --- | --- |
| **5a** | -18.0136 | 2.89 | 69.28 | 310.38 | 5 | 3 |
| **5b** | -19.0561 | 2.87 | 69.28 | 294.36 | 5 | 3 |
| **5c** | -18.4487 | 3.31 | 69.28 | 324.41 | 5 | 3 |
| **5d** | -17.8803 | 3.34 | 69.28 | 324.41 | 5 | 3 |
| **5e** | -19.2291 | 2.90 | 78.51 | 340.41 | 6 | 3 |
| **5f** | -21.5280 | 2.92 | 78.51 | 340.41 | 6 | 3 |
| **5g** | -17.1525 | 2.95 | 78.51 | 340.41 | 6 | 3 |
| **5h** | -18.9164 | 3.01 | 69.28 | 328.37 | 5 | 3 |
| **5i** | -18.0512 | 3.03 | 69.28 | 328.37 | 5 | 3 |
| **5j** | -16.9227 | 3.05 | 69.28 | 328.37 | 5 | 3 |
| **5k** | -19.1458 | 3.52 | 69.28 | 344.83 | 5 | 3 |
| **5l** | -17.9514 | 3.54 | 69.28 | 344.83 | 5 | 3 |
| **5m** | -18.1326 | 3.57 | 69.28 | 344.83 | 5 | 3 |
| **5n** | -17.8227 | 4.17 | 69.28 | 379.27 | 5 | 3 |
| **5o** | -17.3433 | 4.17 | 69.28 | 379.27 | 5 | 3 |

MiLogP = octanol/water partition coefficient; TPSA = Topological Polar Surface Area; MW = molecular weight; nON = number of hydrogen acceptors; nOHNH = number ofhydrogen donors.

1H-NMR spectrum of **5a**


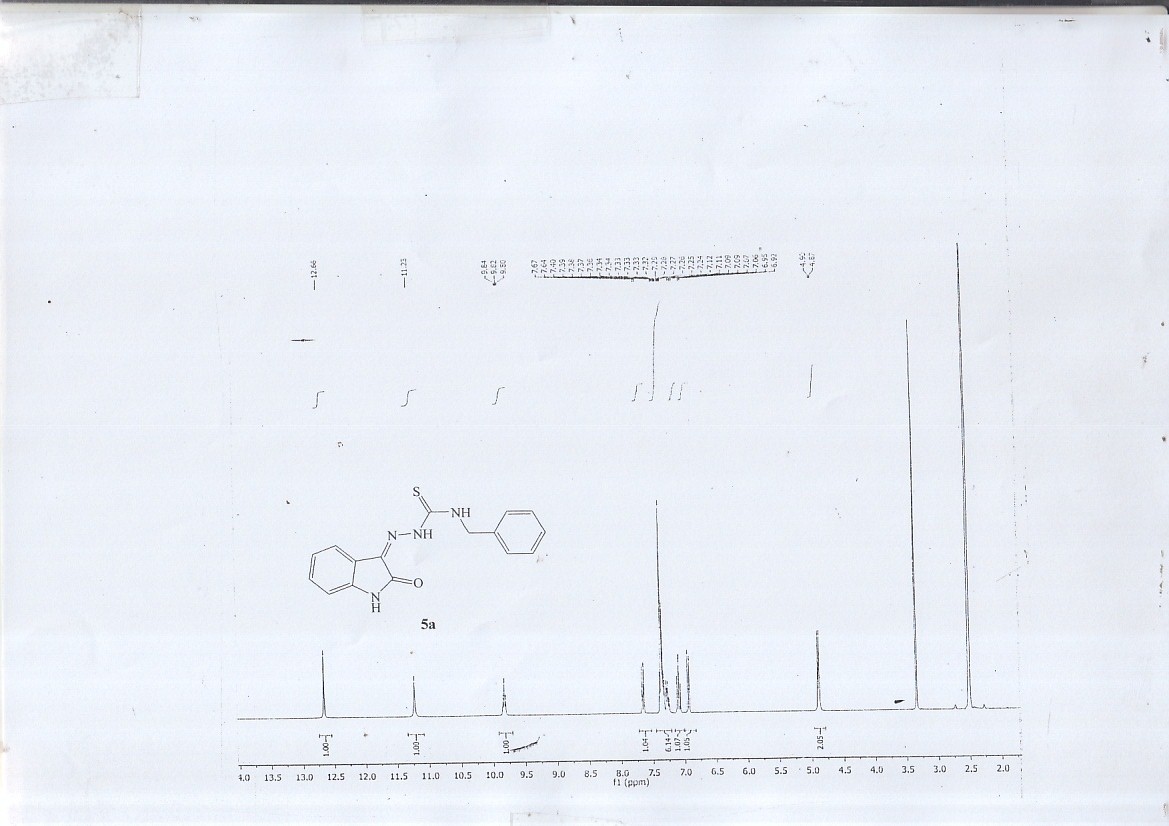


1H-NMR spectrum of **5c**


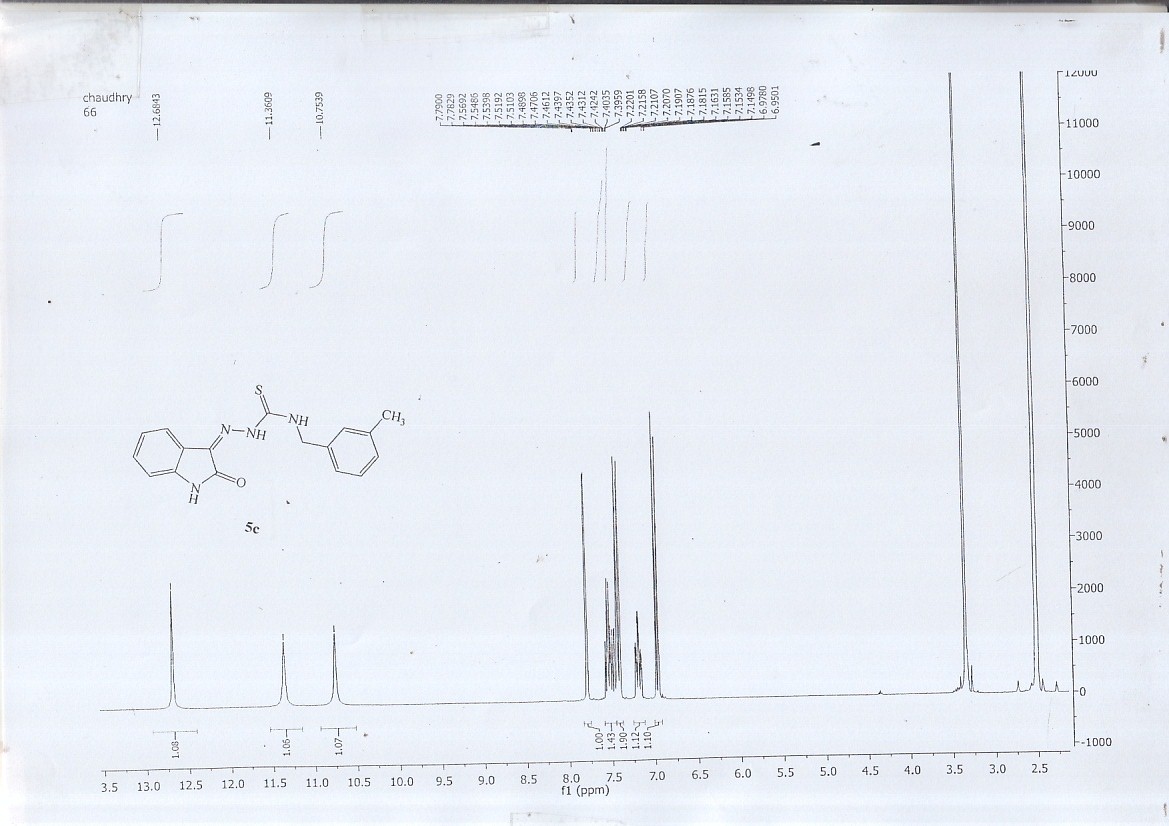


1H-NMR spectrum of **5f**


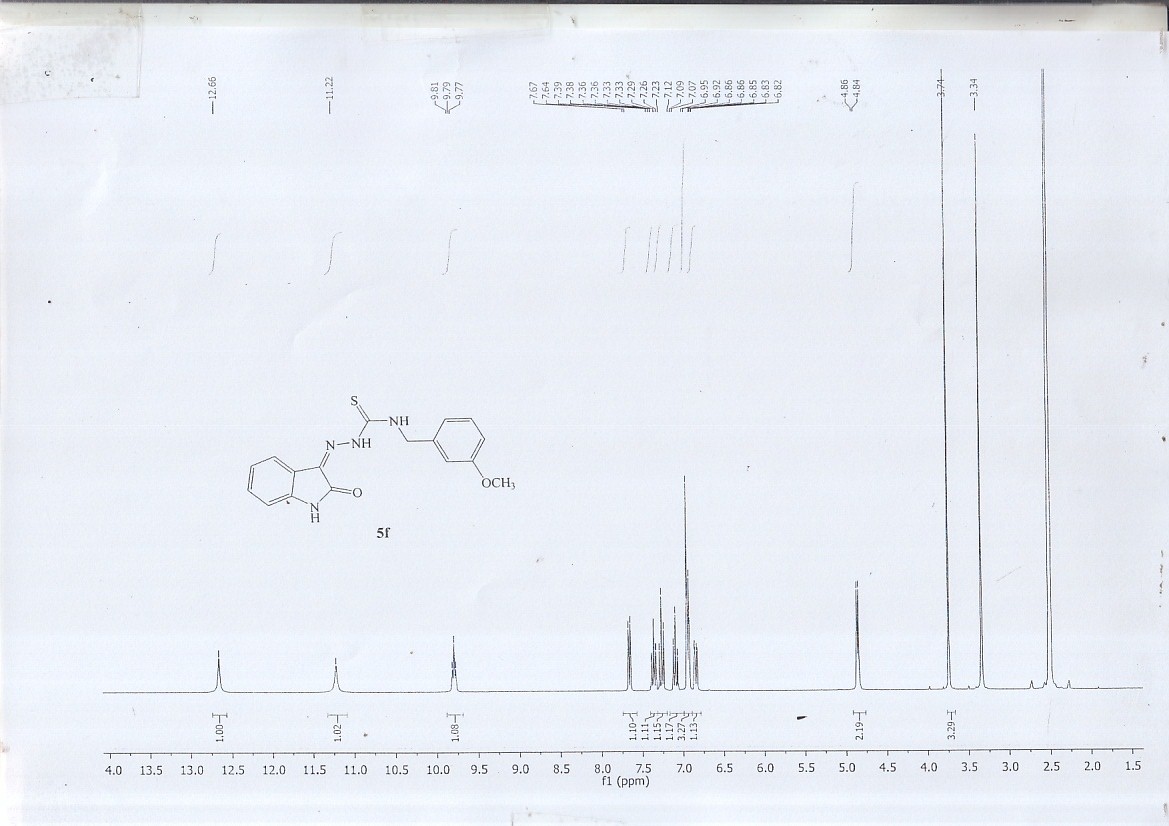


1H-NMR spectrum of **5g**


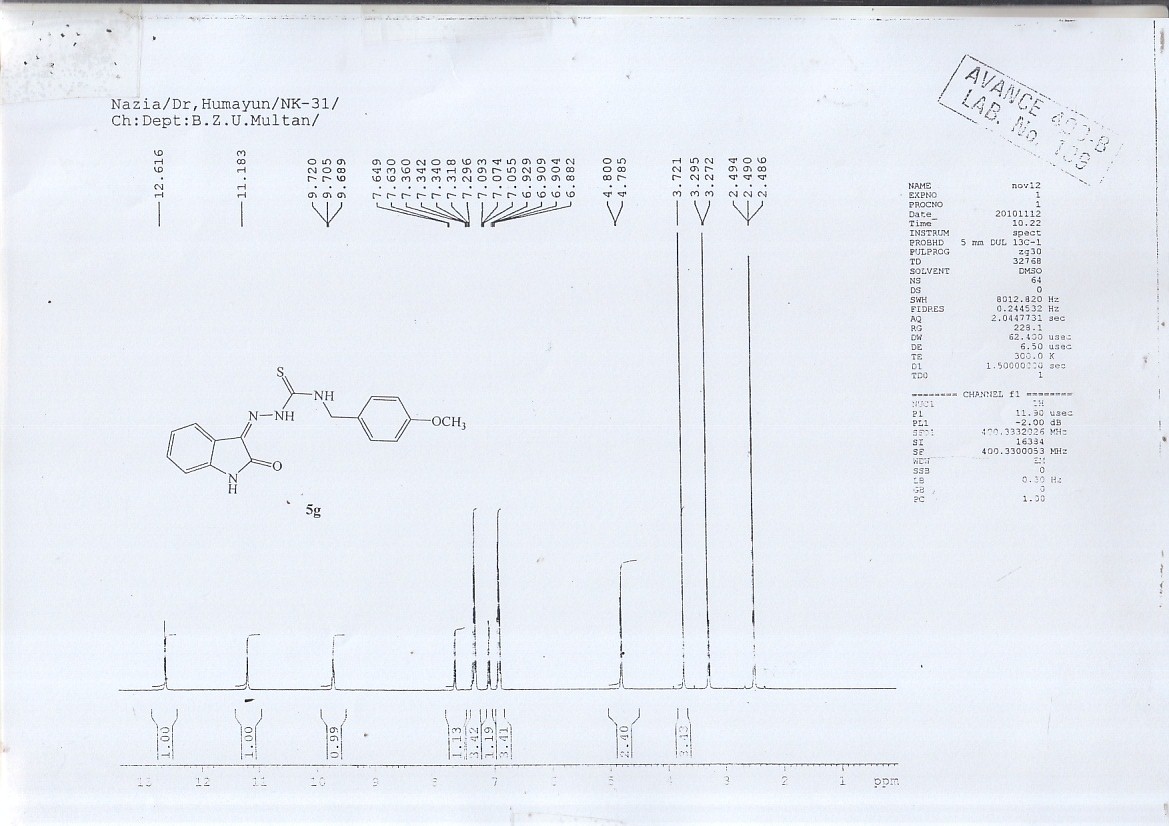


1H-NMR spectrum of **5h**


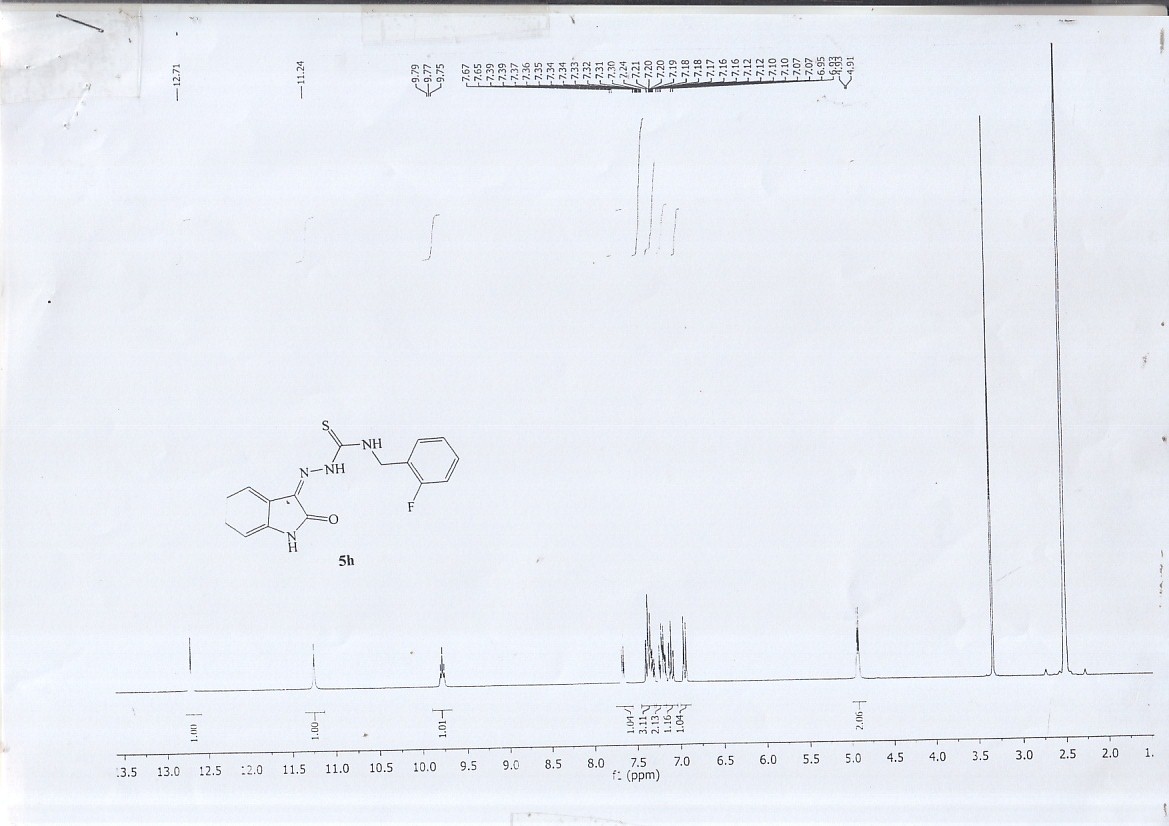


1H-NMR spectrum of **5k**


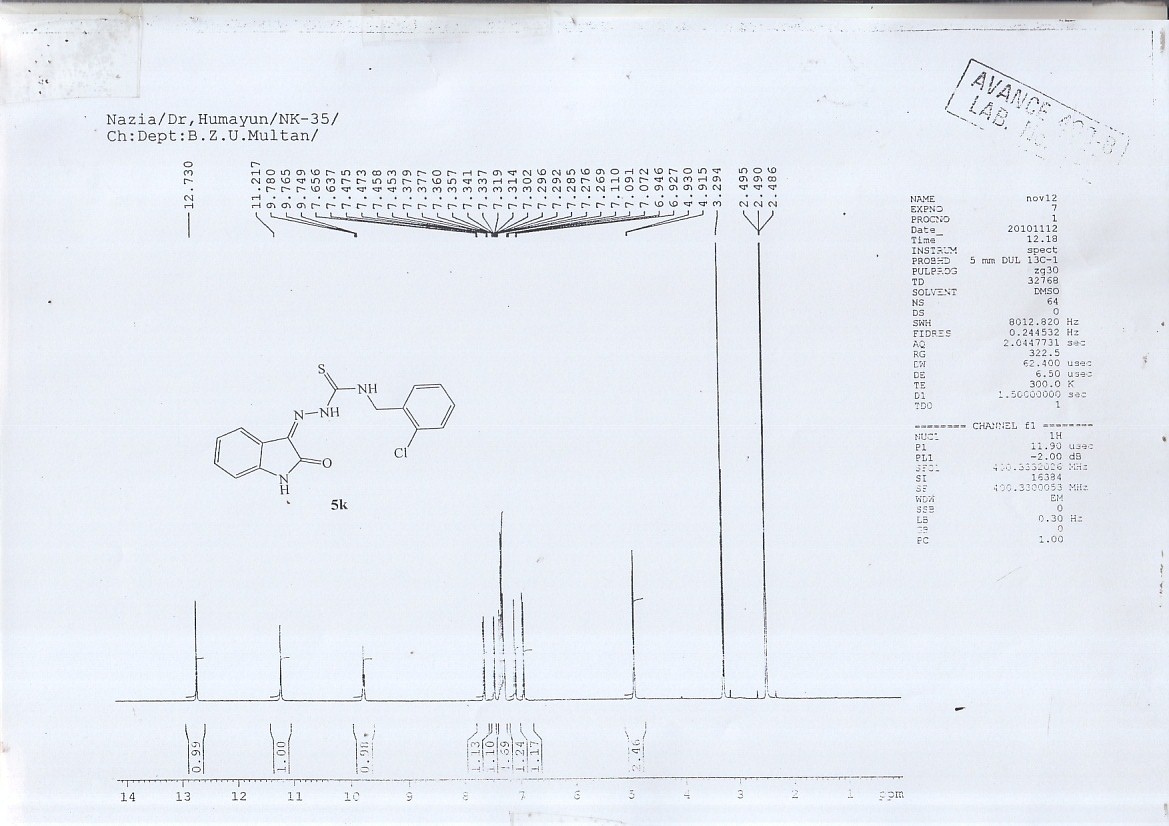


1H-NMR spectrum of **5l**


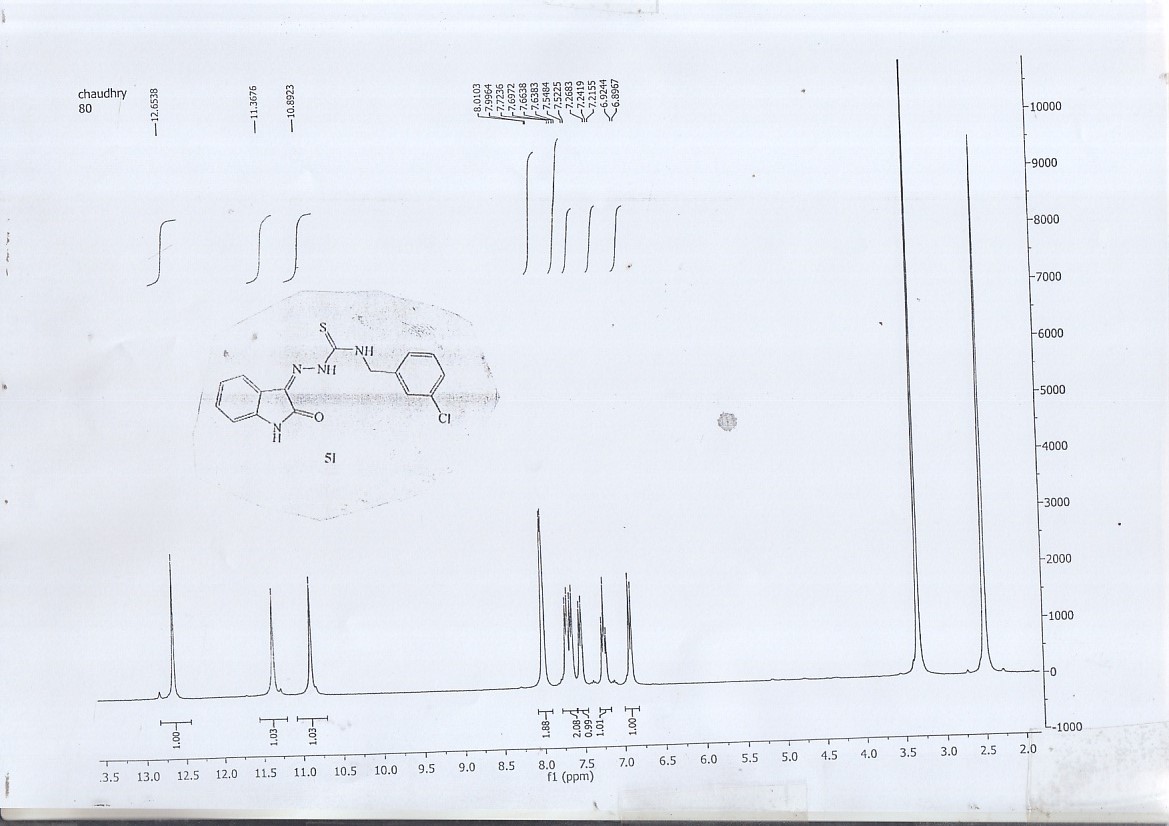


1H-NMR spectrum of **5o**


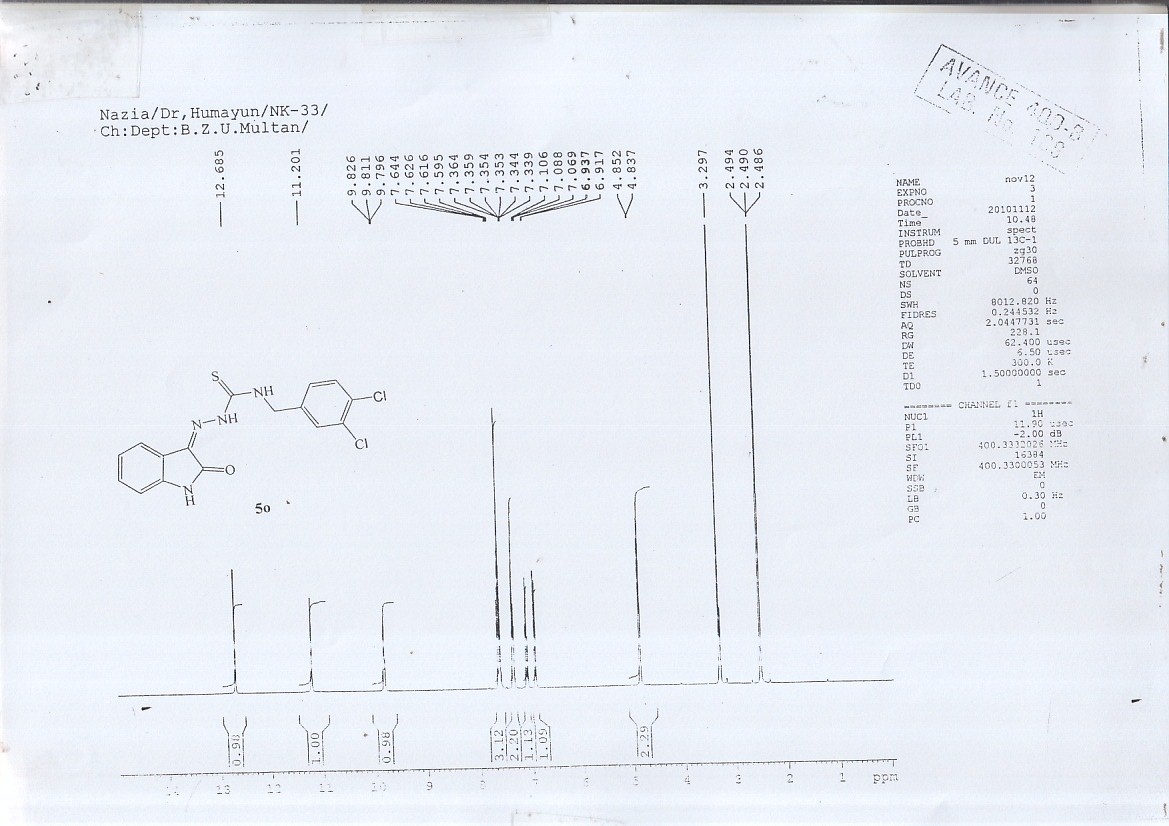


Mass spectrum of **5a**


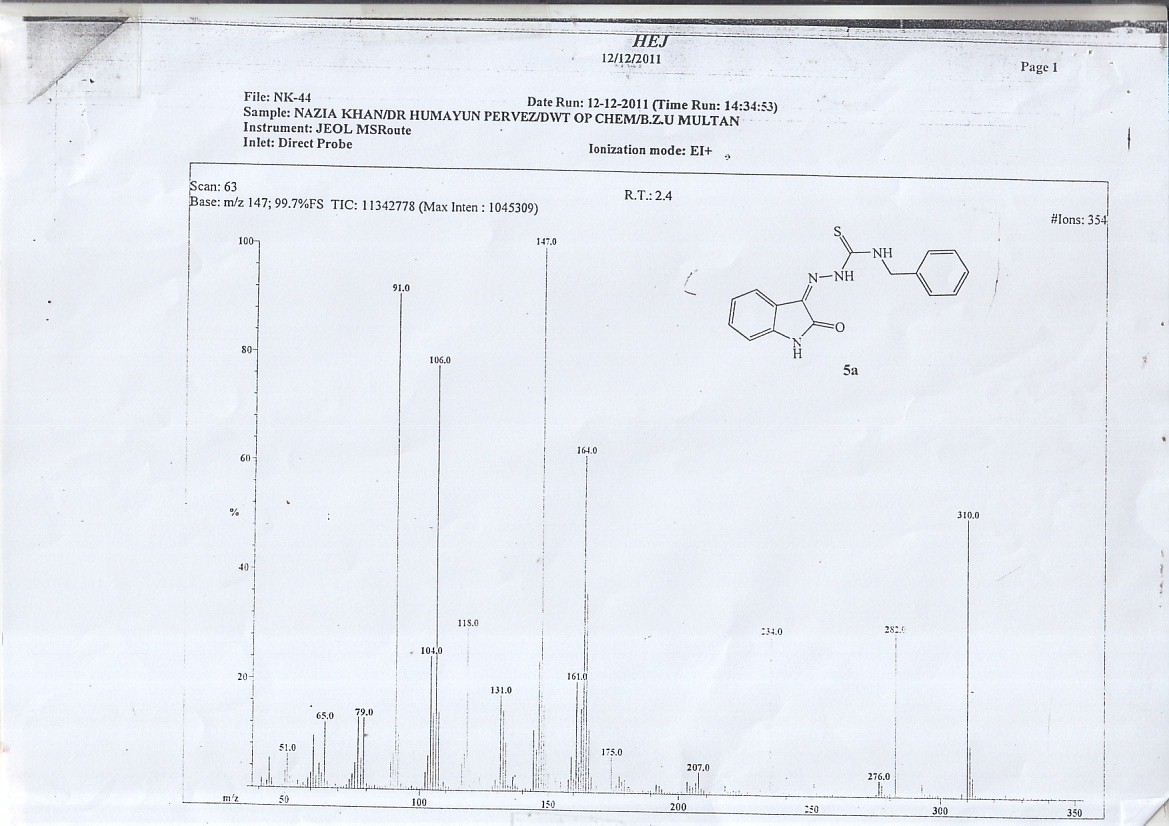


Mass spectrumof **5c**


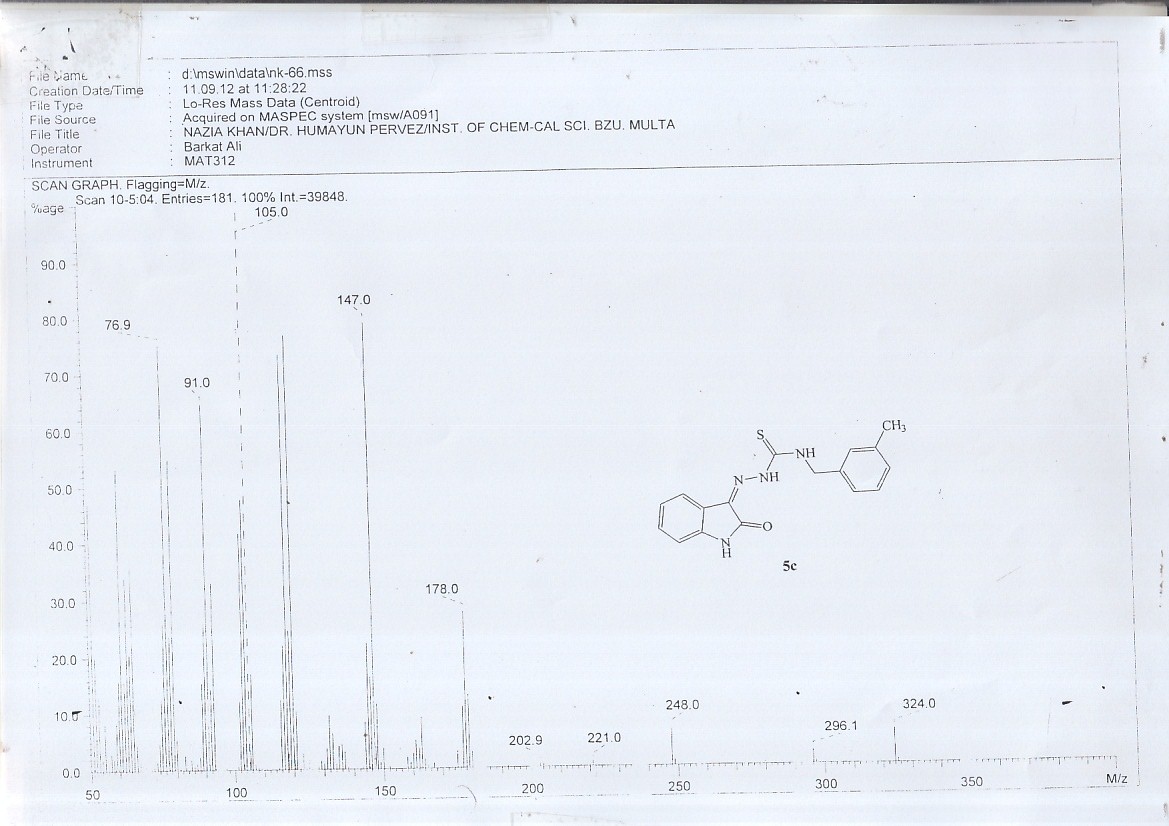


Mass spectrum of **5f**


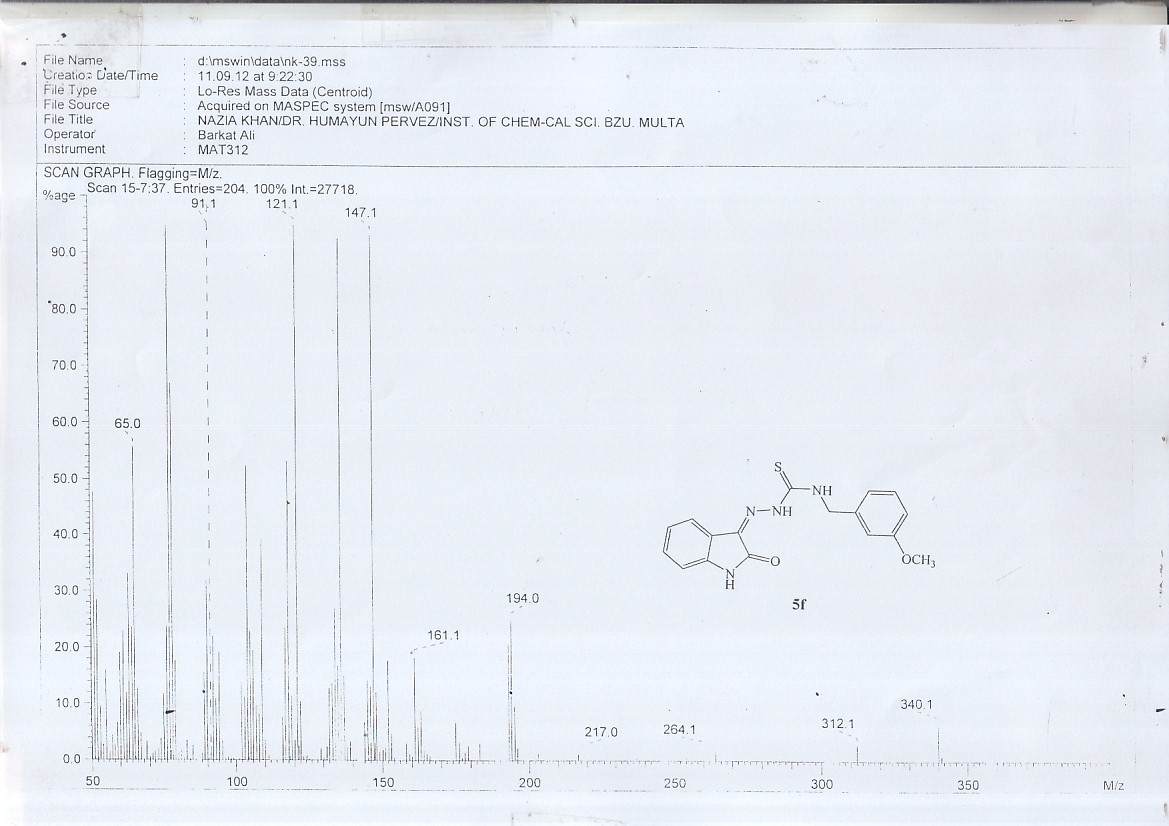


Mass spectrum of **5g**


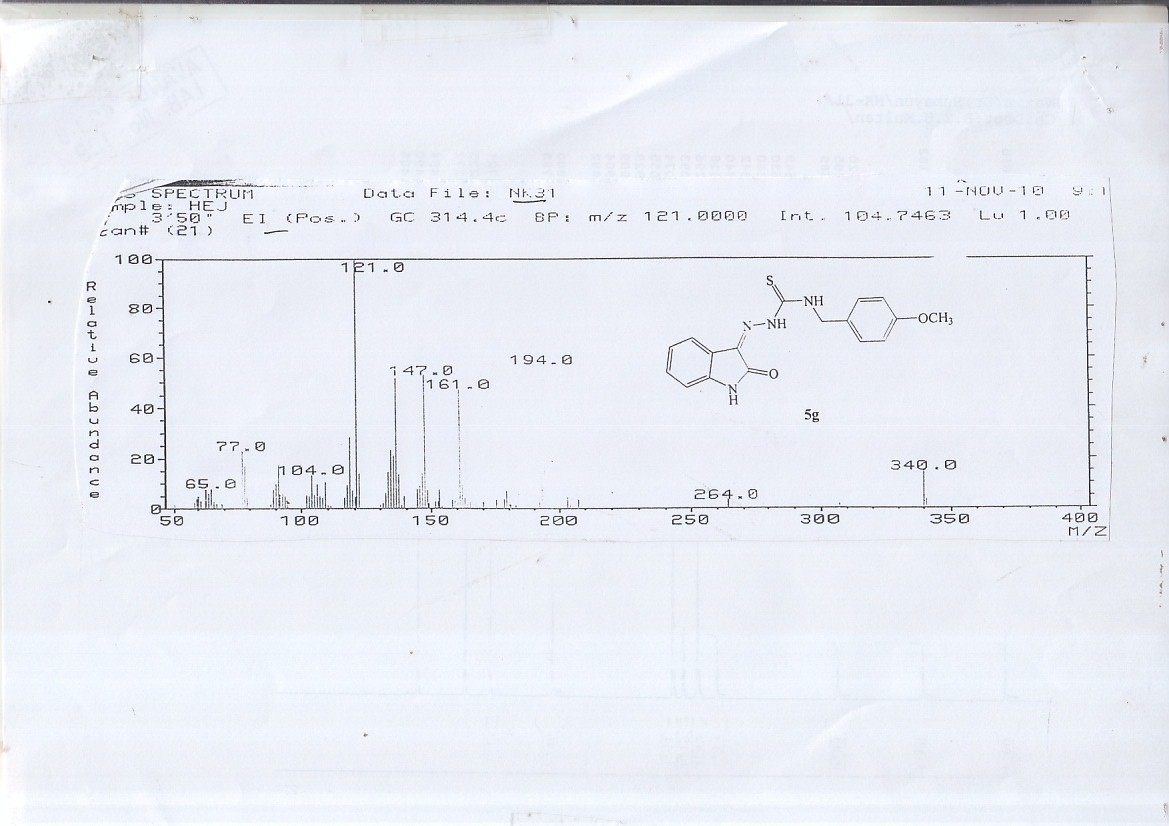


Mass spectrum of **5h**


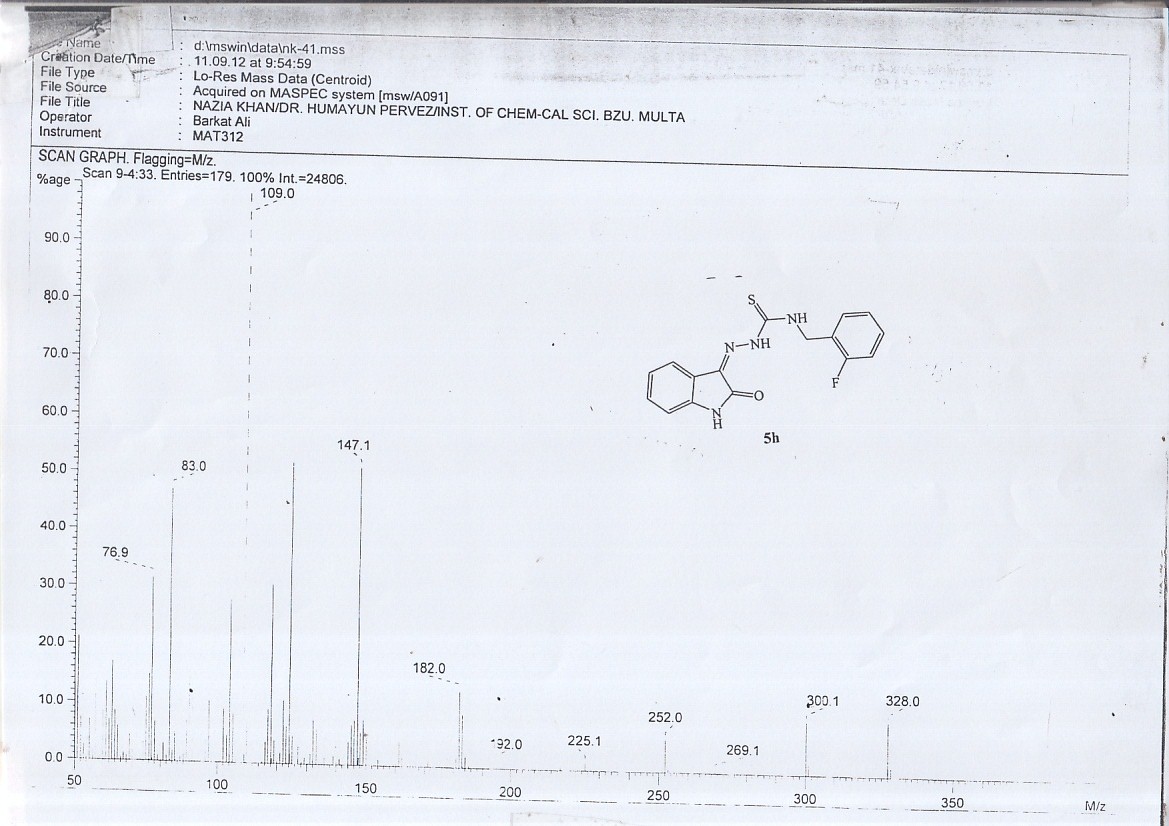


Mass spectrum of **5k**


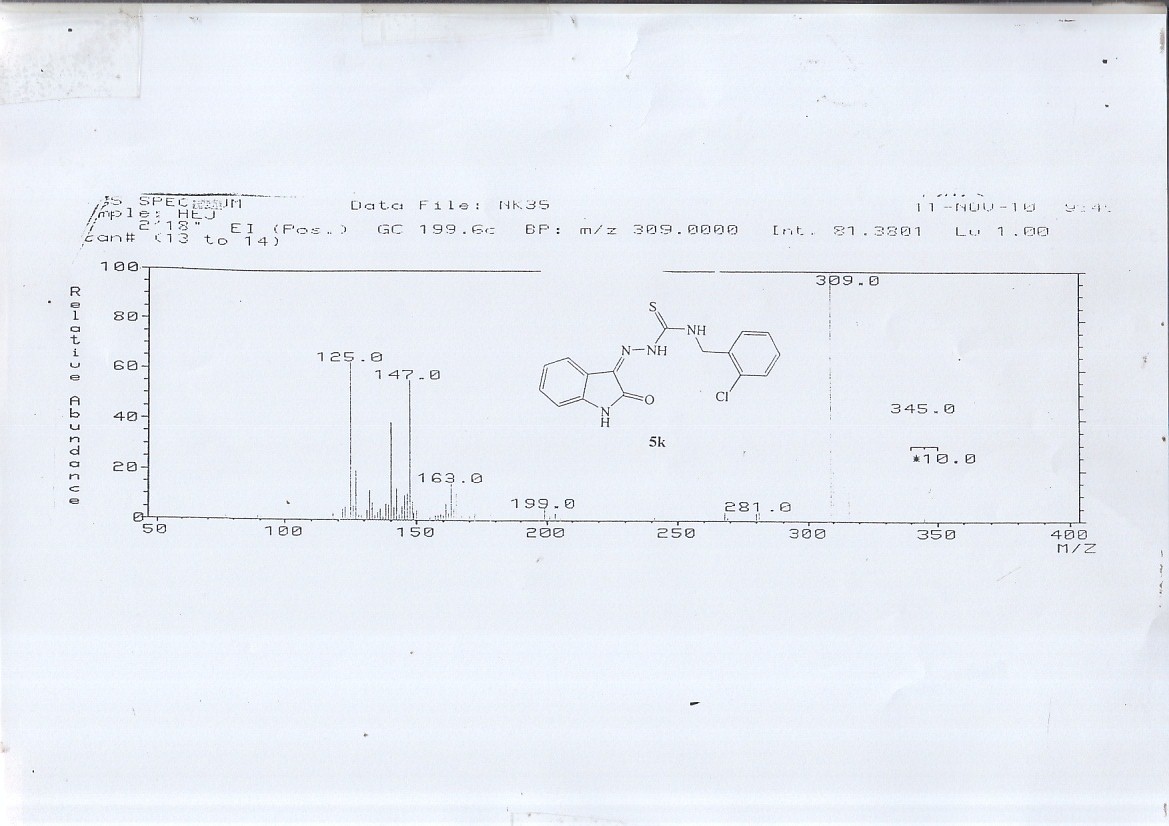


Mass spectrum of **5l**


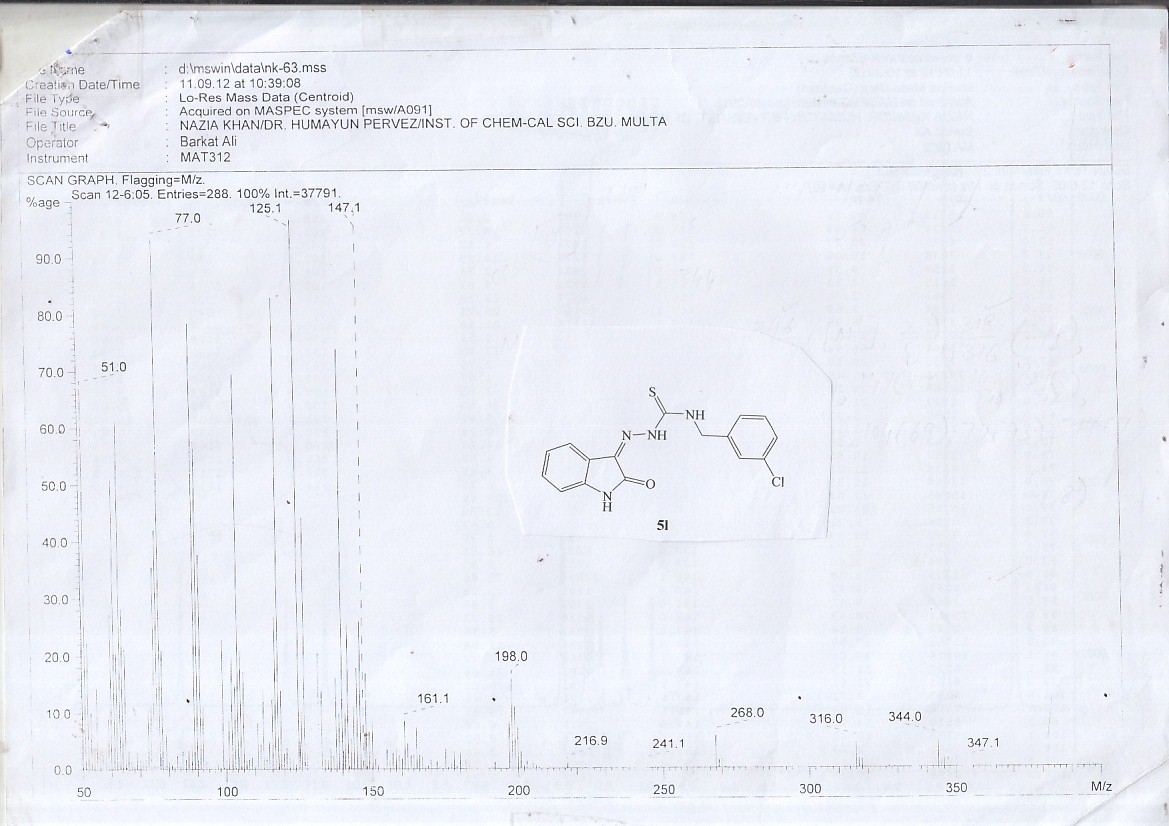


Mass spectrum of **5o**
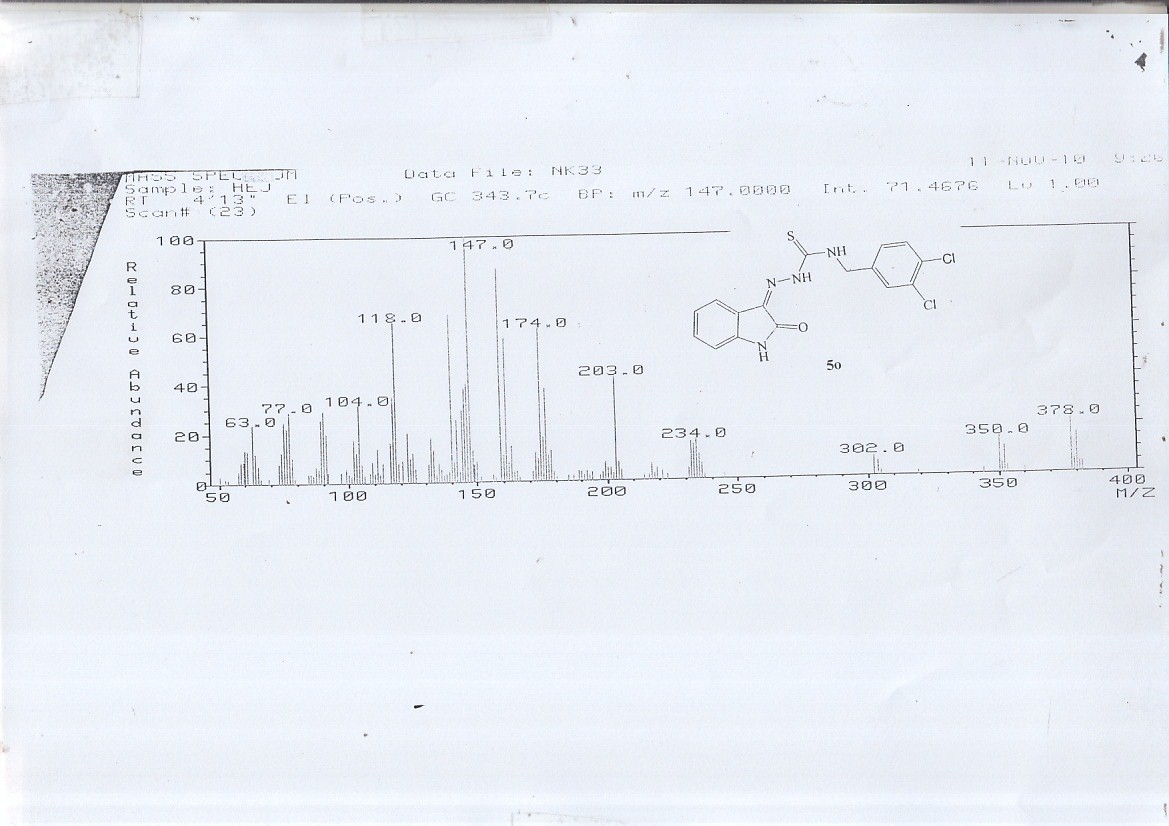


13C-NMR spectrum of **5a**


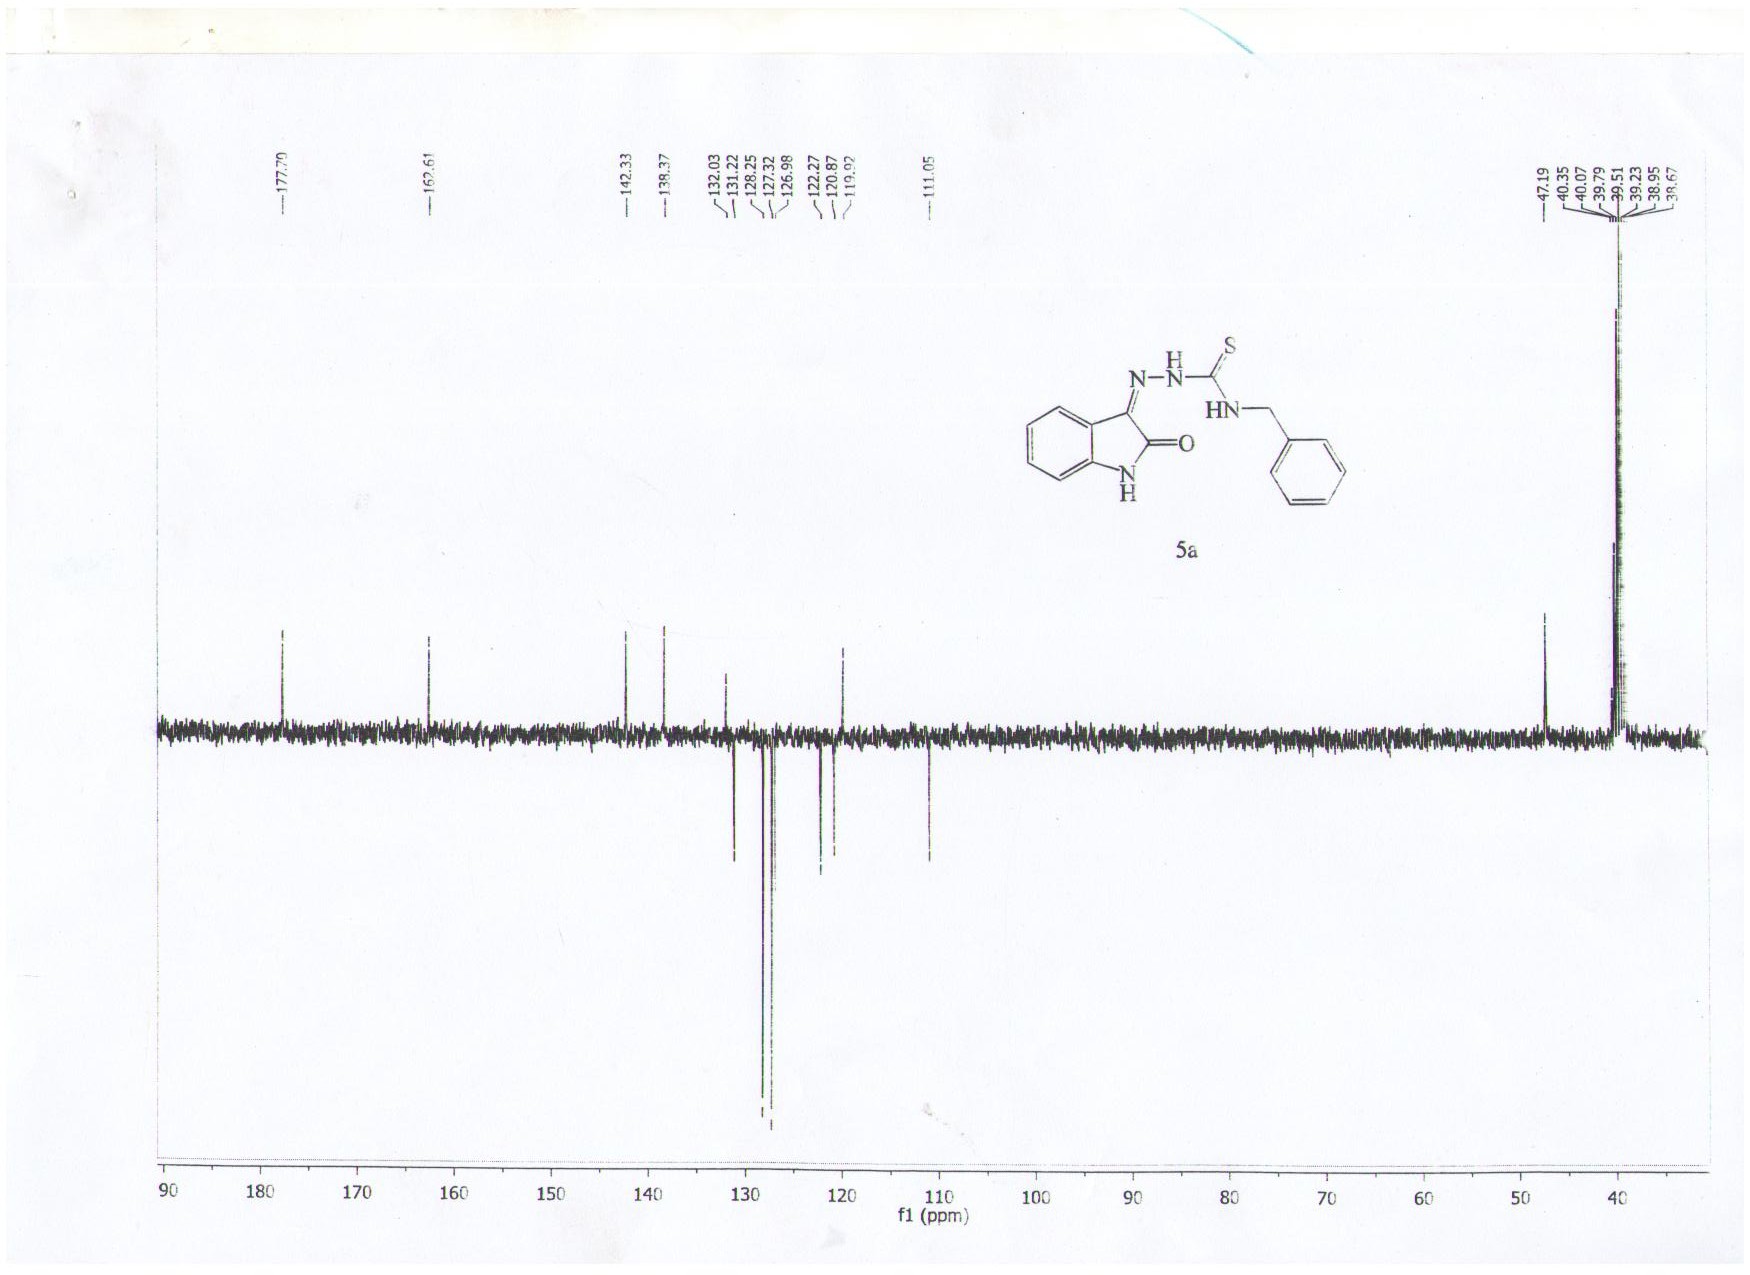


13C-NMR spectrum of **5c**


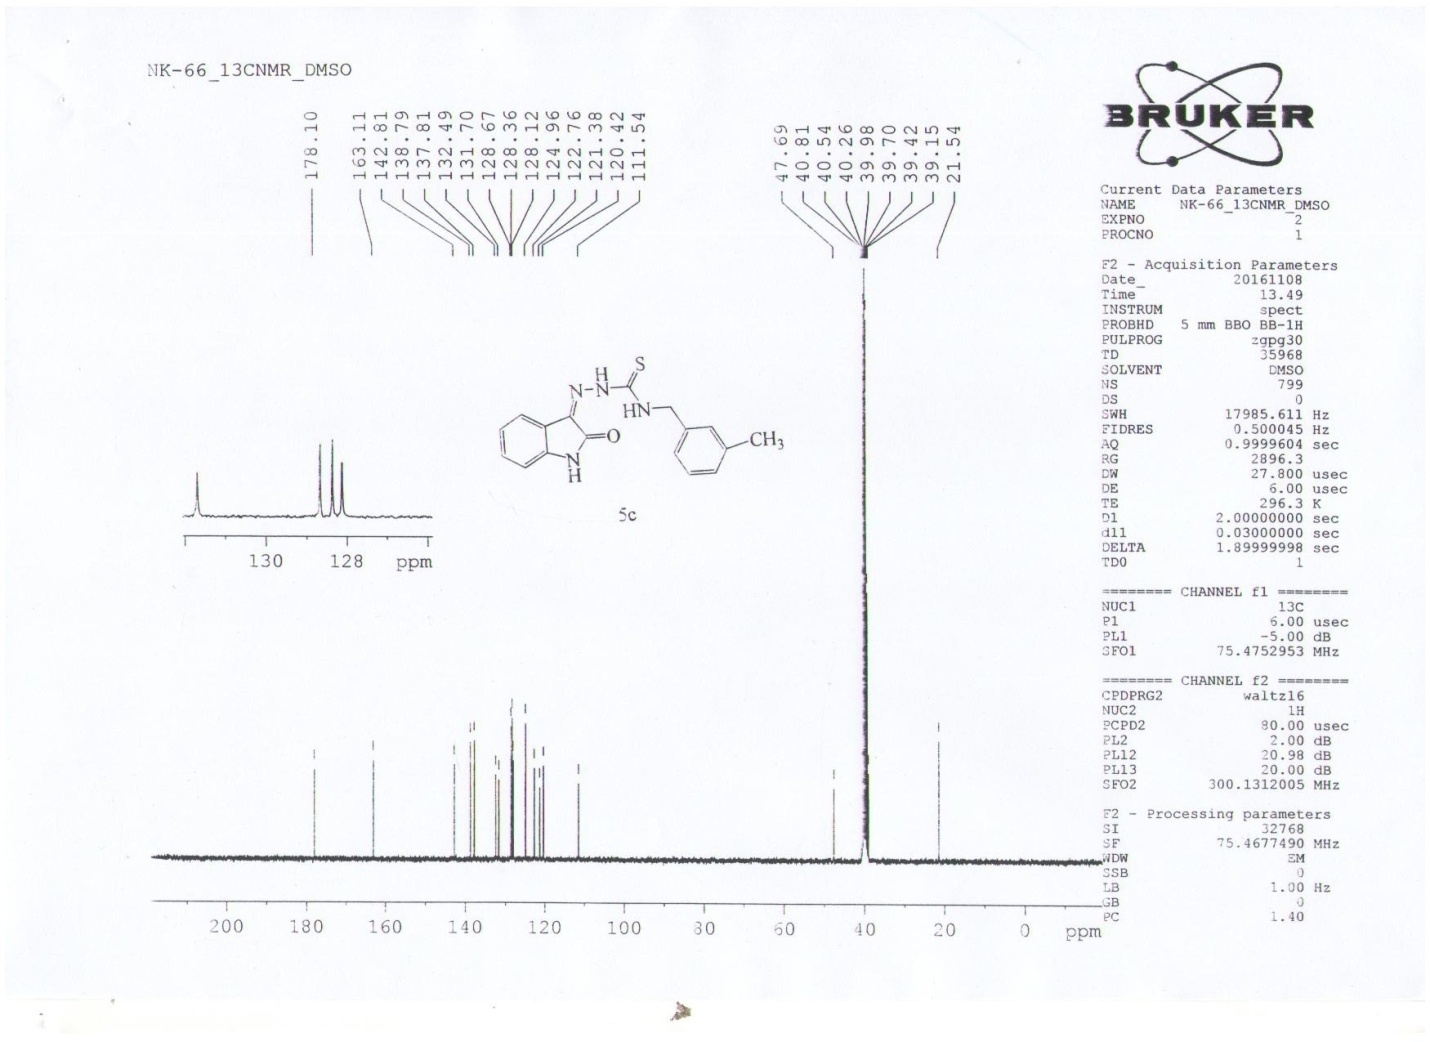


13C-NMR spectrum of **5f**


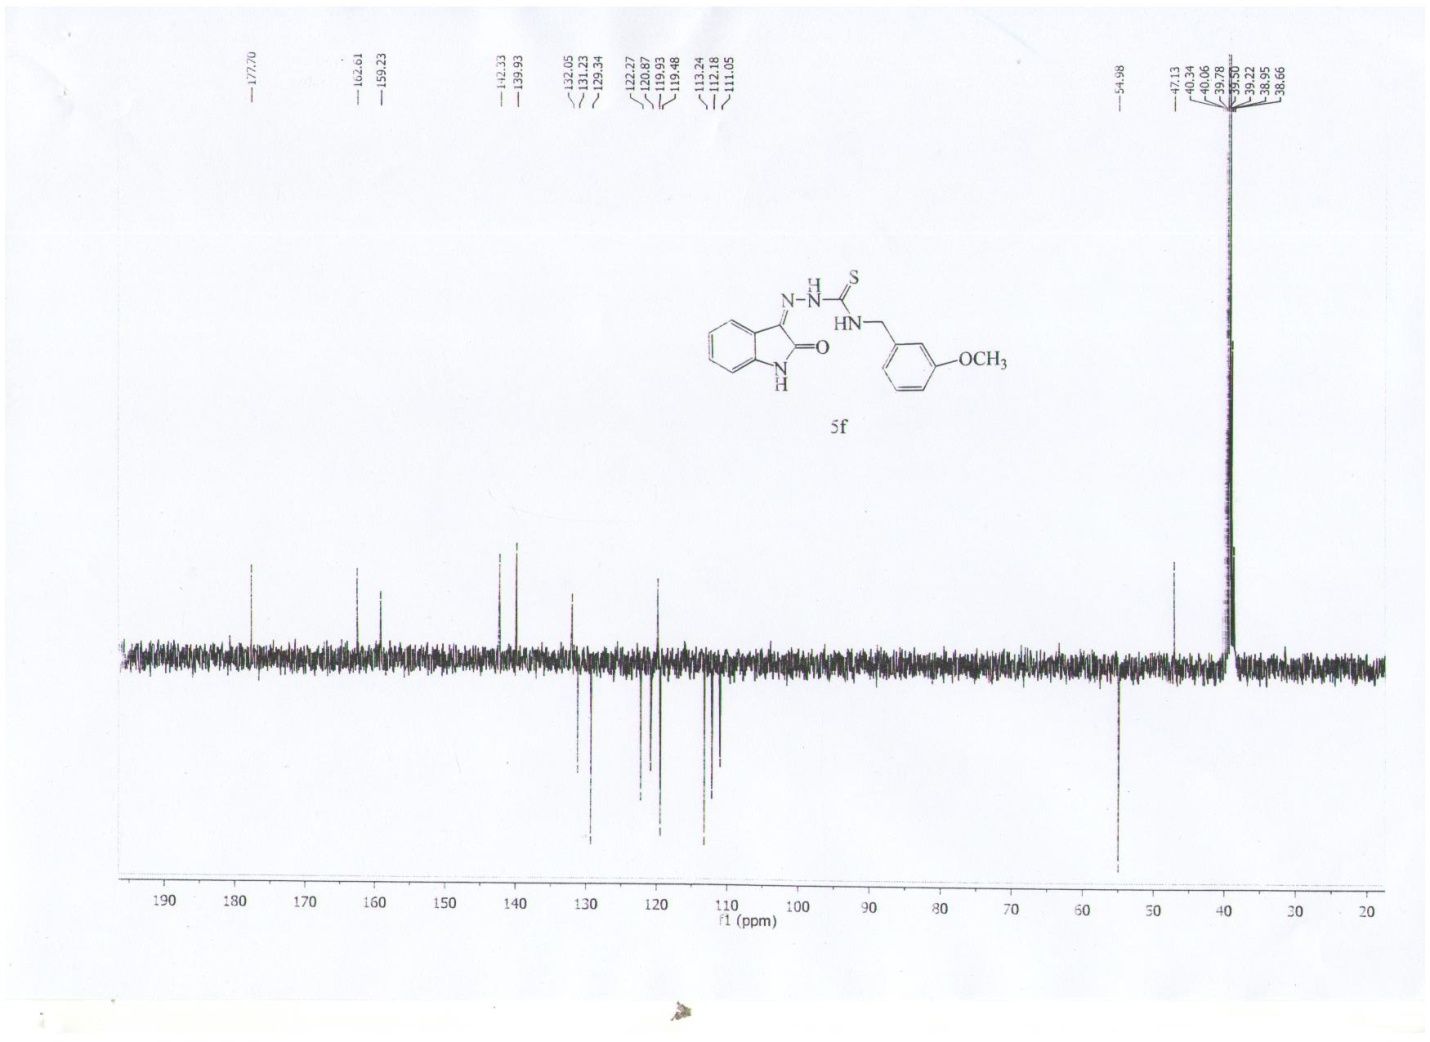


13C-NMR spectrum of **5g**


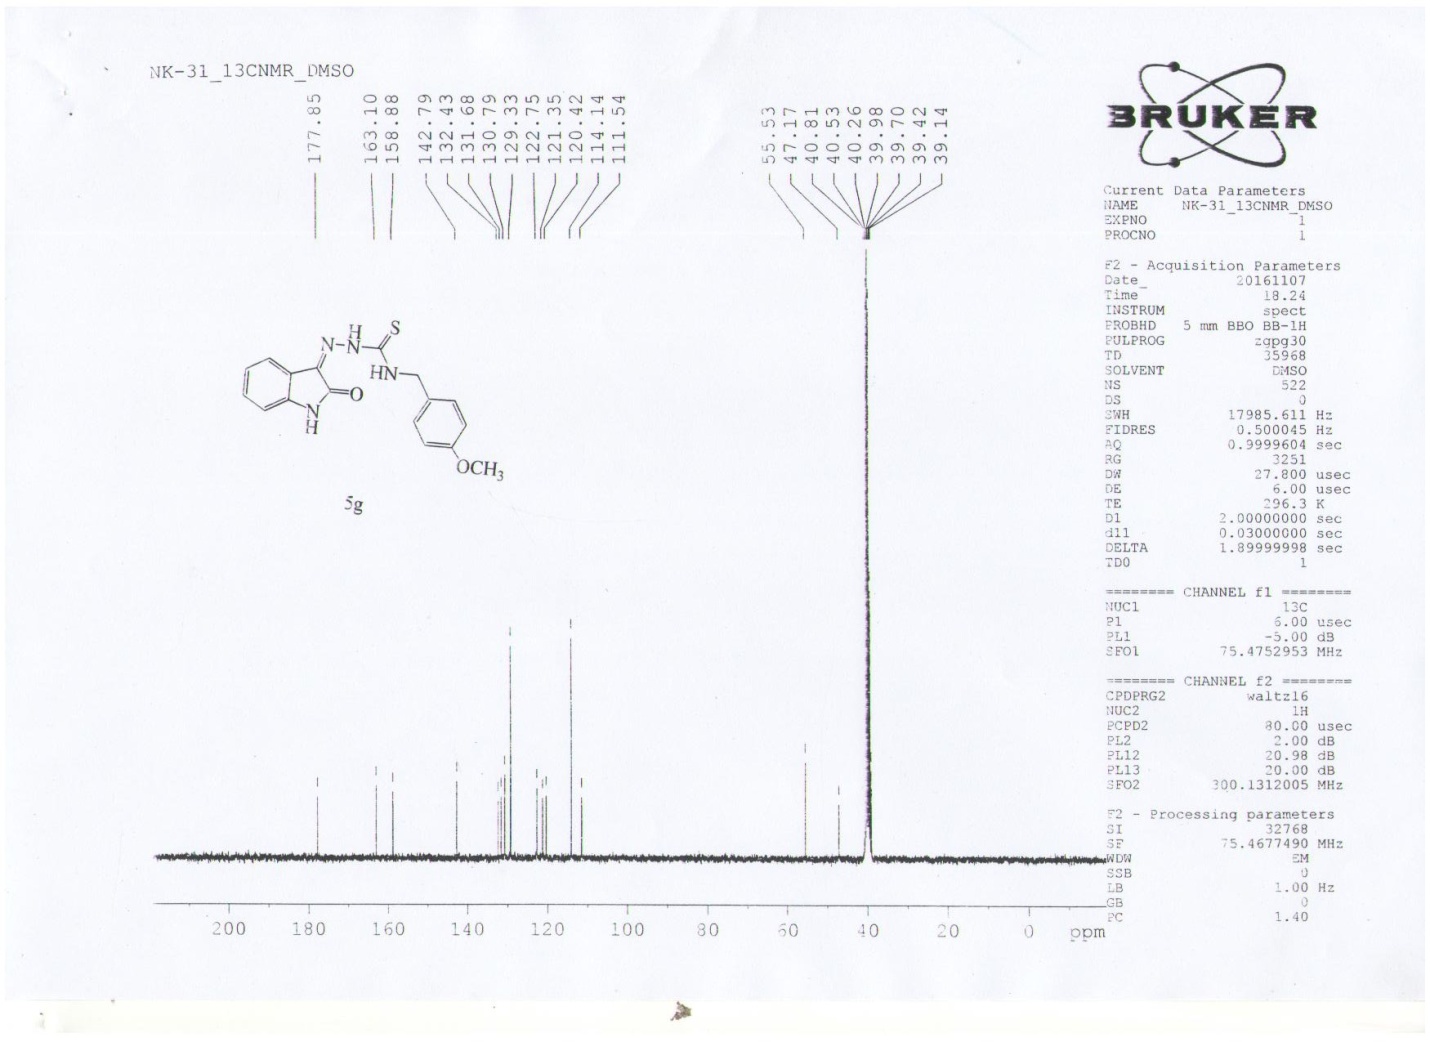


13C-NMR spectrum of **5h**


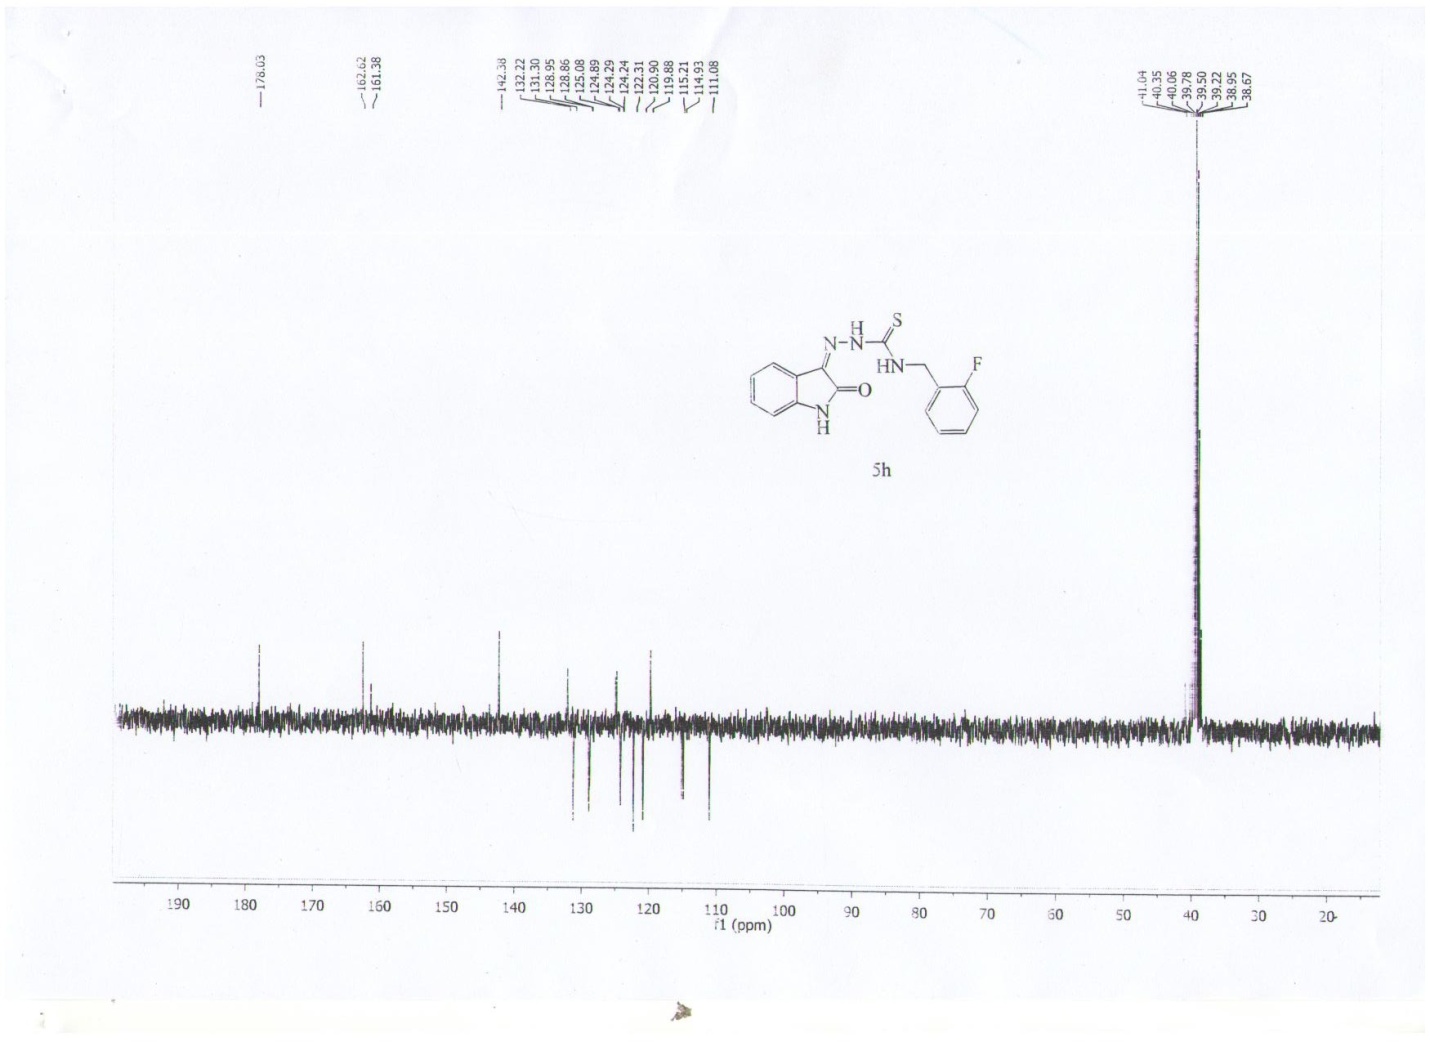


13C-NMR spectrum of **5k**


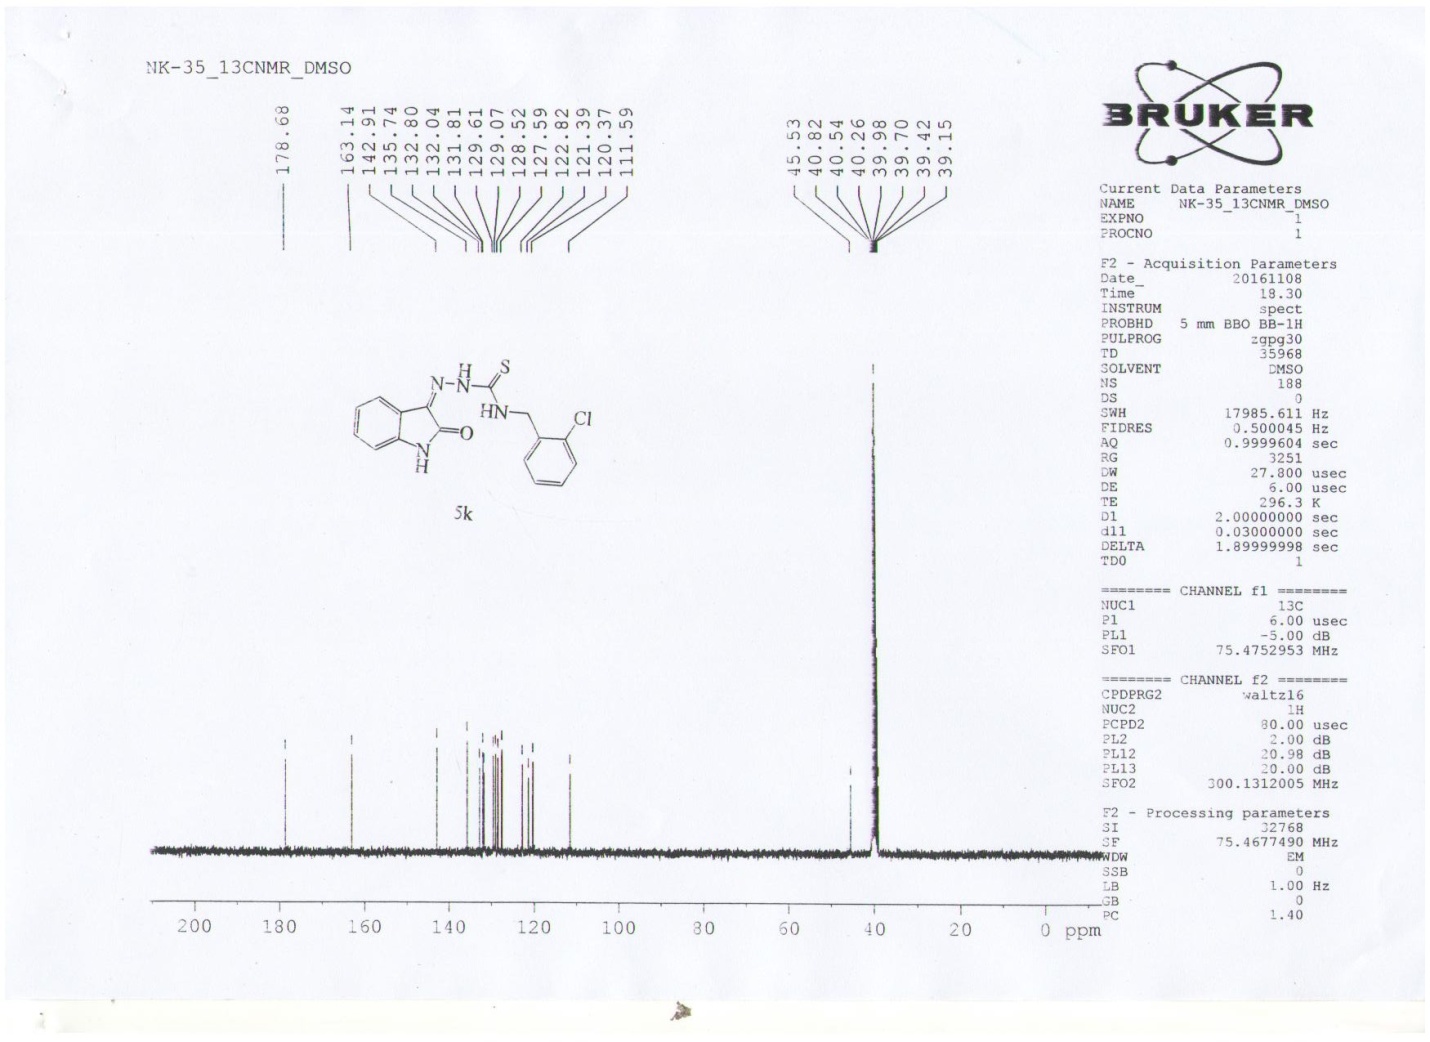


13C-NMR spectrum of **5l**


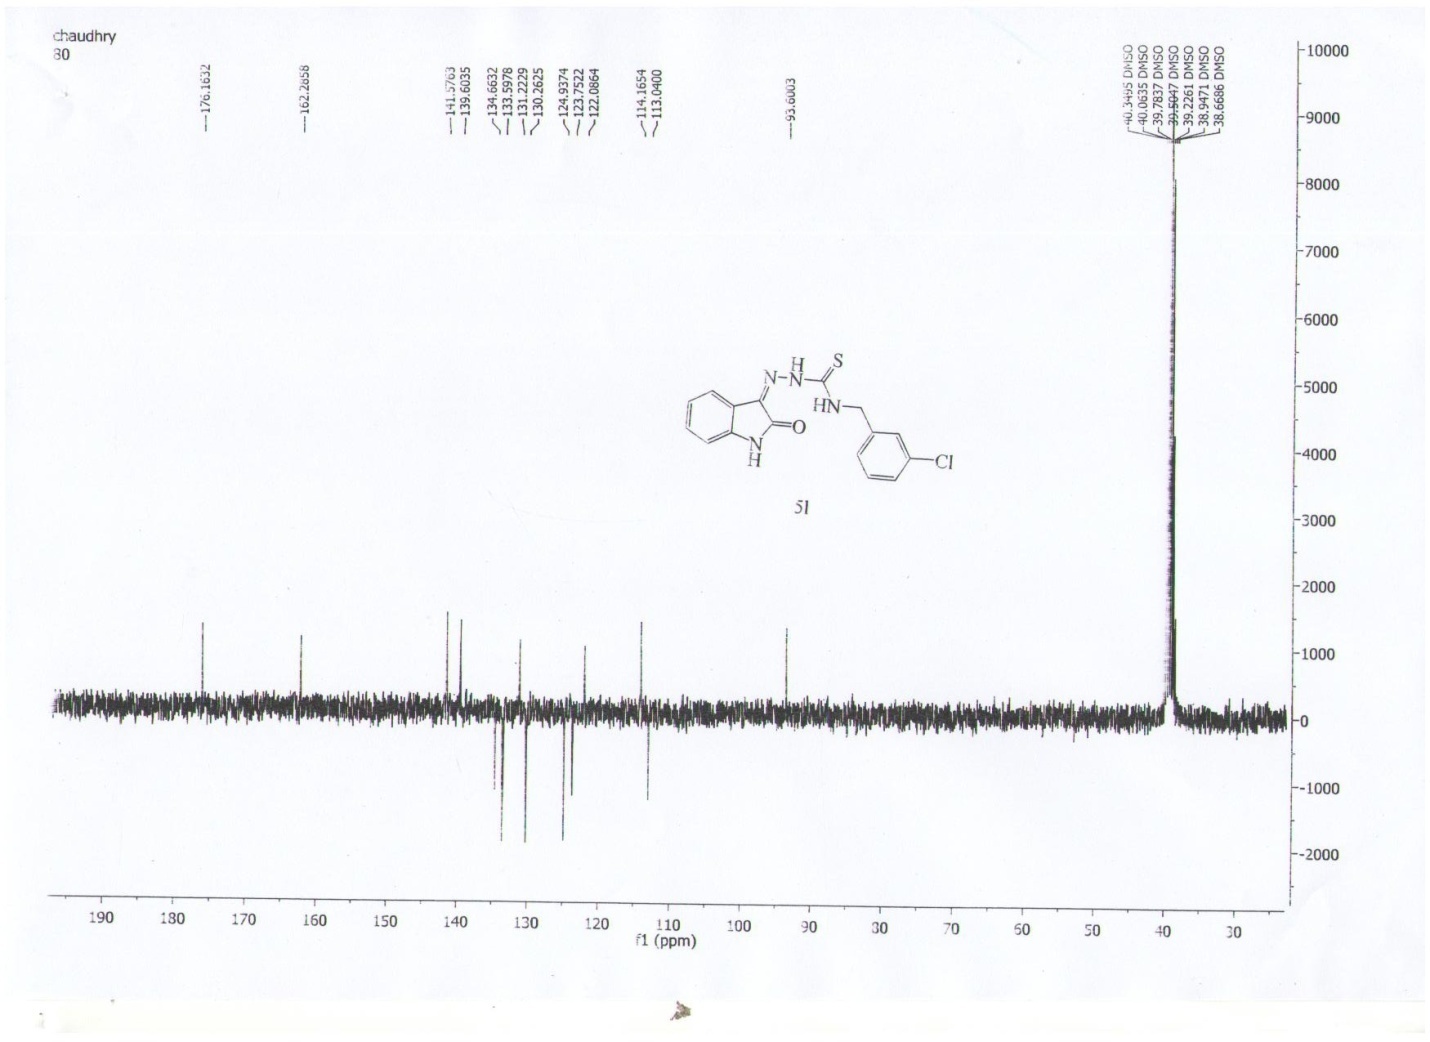


13C-NMR spectrum of **5o**


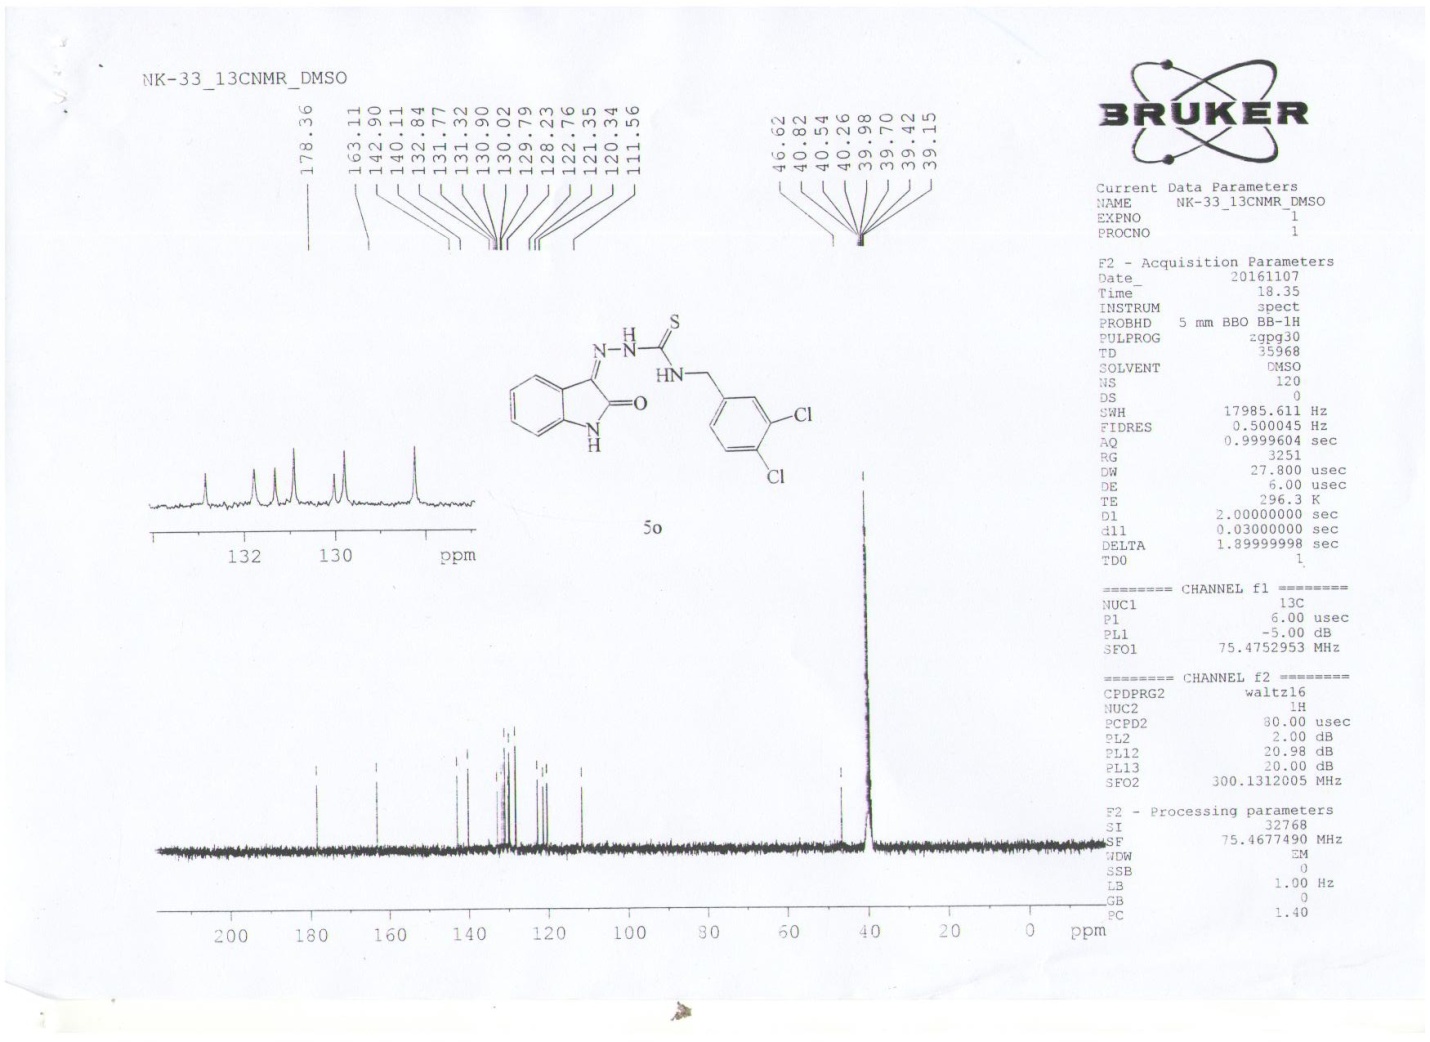

Supplement: Supplementary file 1 [file hc-2017-0148_suppl.docx]
